# Supplementary material for: Evaluation of Isoprene Nitrate Chemistry in Detailed Chemical Mechanisms
Source: Copernicus journal article supplement (doi:10.5194/acp-2022-333), 2022-05-18
Supplement: Supplementary file 1 [file acp-2022-333-supplement.pdf]

# Evaluation of Isoprene Nitrate Chemistry in Detailed Chemical Mechanisms

Alfred W. Mayhew<sup>1</sup>, Ben H. Lee<sup>2</sup>, Joel A. Thornton<sup>2</sup>, Thomas J. Bannan<sup>3</sup>, James Brean<sup>4</sup>, James R. Hopkins<sup>1,5</sup>, James D. Lee<sup>1,5</sup>, Beth S. Nelson<sup>1</sup>, Carl Percival<sup>3</sup>, Andrew R. Rickard<sup>1,5</sup>, Marvin D. Shaw<sup>1,5</sup>, Peter M. Edwards<sup>1</sup>, Jaqueline F. Hamilton<sup>1</sup>

<sup>1</sup>Wolfson Atmospheric Chemistry Laboratories, Department of Chemistry, University of York, Heslington, York, UK

<sup>2</sup>Department of Atmospheric Sciences, University of Washington Seattle, Washington 98195, USA

<sup>3</sup>School of Earth and Environmental Sciences, University of Manchester, Manchester, UK

<sup>4</sup>School of Geography, Earth and Environmental Sciences, University of Birmingham, Birmingham, U.K.

<sup>5</sup>National Centre for Atmospheric Science, University of York, York, UK

Correspondence to: Jaqueline F. Hamilton ([jacqui.hamilton@york.ac.uk](mailto:jacqui.hamilton@york.ac.uk))

## Description of SMPS Instrument

Two scanning mobility particle sizer (SMPS) instruments measured particle size distributions at 15 min time resolution, with one long SMPS with an inlet flowrate of 0.3 L min<sup>-1</sup> (TSI 3080 EC, 3082 long DMA, 3775 CPC, TSI, USA) and one nano SMPS with an inlet flowrate of 1.5 L min<sup>-1</sup> (3082 EC, 3082 nano DMA, 3776 CPC, TSI, USA) measuring the ranges 14–615 and 4–65 nm respectively. A particle size magnifier (A10, Airmodus, FN) linked to a CPC (3775, TSI, USA) measured the sub-3 nm size fraction with an inlet flowrate of 2.5 L min<sup>-1</sup>. The PSM was run in stepping mode, operating at four different saturator flows to vary the lowest size cut-off of particles that it will grow (this cut-off is technically a point of 50 % detection efficiency) of < 1.30, 1.36, 1.67, and 2.01 nm. The instrument switched between saturator flows per 2.5 min, giving a sub2.01 nm size distribution every 10 min. The data were treated with a moving-average filter to account for jumps in total particle count, and due to the similar behaviour of the two upper and two lower size cuts, these have been averaged to two size cuts at 1.30 and 1.84 nm. No drying was performed on the inlet air.

Table S1. Summary of the properties of each mechanism used in this work. Note that the statistics for the “Caltech Mechanism” and “FZJ Mechanism” apply to the mechanisms in the form used in this work, i.e. with the incorporated MCM subset for non-isoprene VOCs and with RO<sub>2</sub> reactions lumped as described in the main text for the Caltech Mechanism.

| Property                                                         | MCM   | Caltech Mechanism | FZJ Mechanism |
|------------------------------------------------------------------|-------|-------------------|---------------|
| Number of Reactions                                              | 10371 | 10608             | 12372         |
| Number of Species                                                | 3443  | 3476              | 3592          |
| Number of INO <sub>2</sub> Isomers                               | 1     | 4                 | 8             |
| Number of IPN Isomers                                            | 1     | 4                 | 4             |
| Number of ΣIPN Isomers                                           | 6     | 11                | 13            |
| Number of IHN Isomers                                            | 5     | 8                 | 8             |
| Number of ΣIHN Isomers                                           | 9     | 12                | 12            |
| Number of ICN Isomers                                            | 1     | 3                 | 3             |
| Number of ΣICN Isomers                                           | 1     | 3                 | 3             |
| Number of C <sub>4</sub> H <sub>7</sub> NO <sub>5</sub> Isomers  | 4     | 4                 | 4             |
| Number of ΣC <sub>4</sub> H <sub>7</sub> NO <sub>5</sub> Isomers | 10    | 10                | 10            |

Table S2. List of VOCs (and their names in the MCM) constrained to measured concentrations in the models. The "Measurement(s) Used" column indicates which instrument's measurements were used to constrain each species in model runs: proton transfer mass spectrometry (PTR), selected ion flow tube mass spectrometry (SIFT), comprehensive two dimensional gas chromatography with flame ionisation detection (GC×GC), and dual-channel gas chromatography with flame ionization detection (DC-GC).

| Compound        | MCM Name  | Measurement(s) Used | Compound               | MCM Name | Measurement(s) Used     |
|-----------------|-----------|---------------------|------------------------|----------|-------------------------|
| isoprene        | C5H8      | DC-GC, SIFT, PTR    | i-pentane              | IC5H12   | DC-GC                   |
| α-pinene        | APINENE   | GC×GC               | n-hexane               | NC6H14   | DC-GC                   |
| limonene        | LIMONENE  | GC×GC               | n-heptane              | NC7H16   | DC-GC                   |
| ethene          | C2H4      | DC-GC, SIFT         | n-octane               | NC8H18   | DC-GC                   |
| propene         | C3H6      | DC-GC, SIFT,        | n-nonane               | NC9H20   | GC×GC                   |
| trans-2-butene  | TBUT2ENE  | DC-GC               | n-decane               | NC10H22  | GC×GC                   |
| 1-butene        | BUT1ENE   | DC-GC               | n-undecane             | NC11H24  | GC×GC                   |
| i-butene        | MEPROPENE | DC-GC               | n-dodecane             | NC12H26  | GC×GC                   |
| cis-2-butene    | CBUT2ENE  | DC-GC               | benzene                | BENZENE  | DC-GC, SIFT, PTR        |
| trans-2-pentene | TPENT2ENE | DC-GC               | Ethylbenzene           | EBENZ    | GC×GC, DC-GC, SIFT, PTR |
| cis-2-pentene   | CPENT2ENE | DC-GC               | propylbenzene          | PBENZ    | GC×GC, SIFT, PTR        |
| 1,3-butadiene   | C4H6      | DC-GC, SIFT         | isopropylbenzene       | IPBENZ   | GC×GC                   |
| acetylene       | C2H2      | DC-GC, SIFT         | 1,3,5-trimethylbenzene | TM135B   | GC×GC                   |
| methanol        | CH3OH     | DC-GC, SIFT         | 1,2,3-trimethylbenzene | TM123B   | GC×GC                   |
| ethanol         | C2H5OH    | DC-GC, SIFT         | 1,2,4-trimethylbenzene | TM124B   | GC×GC                   |
| ethane          | C2H6      | DC-GC               | toluene                | TOLUENE  | DC-GC, SIFT, PTR        |
| propane         | C3H8      | DC-GC, SIFT         | m-ethyltoluene         | METHTOL  | GC×GC                   |
| n-butane        | NC4H10    | DC-GC               | p-ethyltoluene         | PETHTOL  | GC×GC                   |
| i-butane        | IC4H10    | DC-GC               | o-ethyltoluene         | OETHTOL  | GC×GC                   |
| n-pentane       | NC5H12    | DC-GC               | o-xylene               | OXYL     | GC×GC, DC-GC            |

Table S3. Deposition rates used in the models depending on functionality. All values are taken from Nguyen et al. 2015.

| Functionality                                 | Deposition Velocity ( $\text{cm s}^{-1}$ ) |
|-----------------------------------------------|--------------------------------------------|
| H <sub>2</sub> O <sub>2</sub>                 | 5.2                                        |
| HNO <sub>3</sub>                              | 3.8                                        |
| O <sub>3</sub>                                | 0.1                                        |
| Organic Hydroperoxide (R-OOH)                 | 1.8                                        |
| Organic Nitrate (R-ONO <sub>2</sub> )         | 2.0                                        |
| Formic Acid and All Carboxylic Acids (R-COOH) | 1.0                                        |
| Oxidised Volatile Organic Compound (OVOC)     | 1.2                                        |

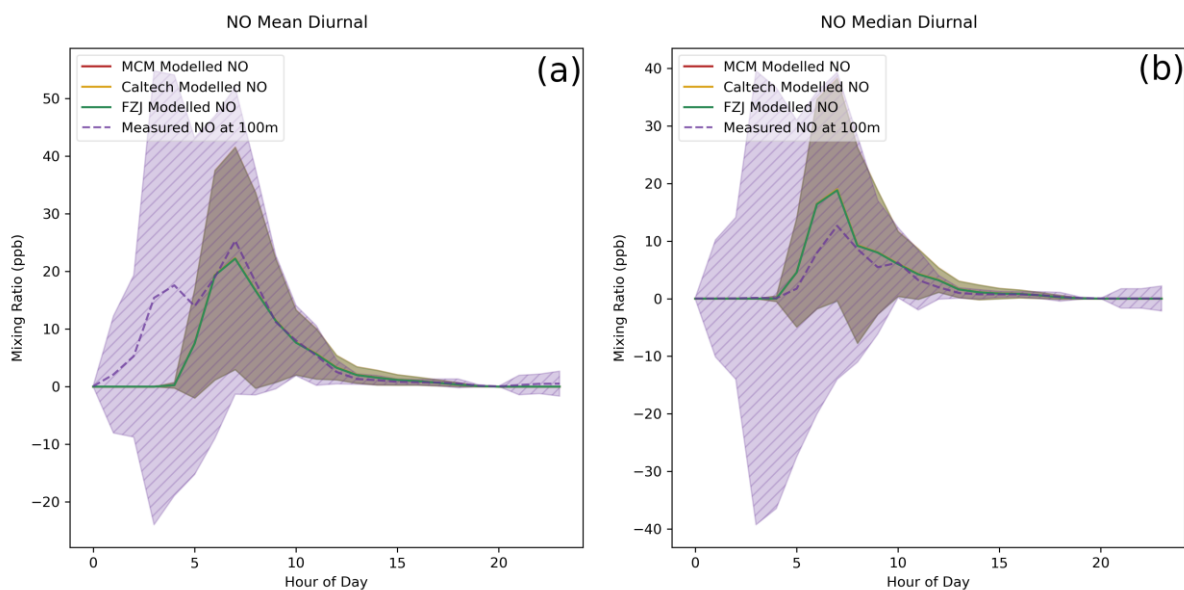

Figure S1. Measured NO at 100m and modelled NO in each model. The mean values (a) show a peak before sunrise due to large spikes in the measurements in the morning on some days, so the median diurnal (b) is also shown.

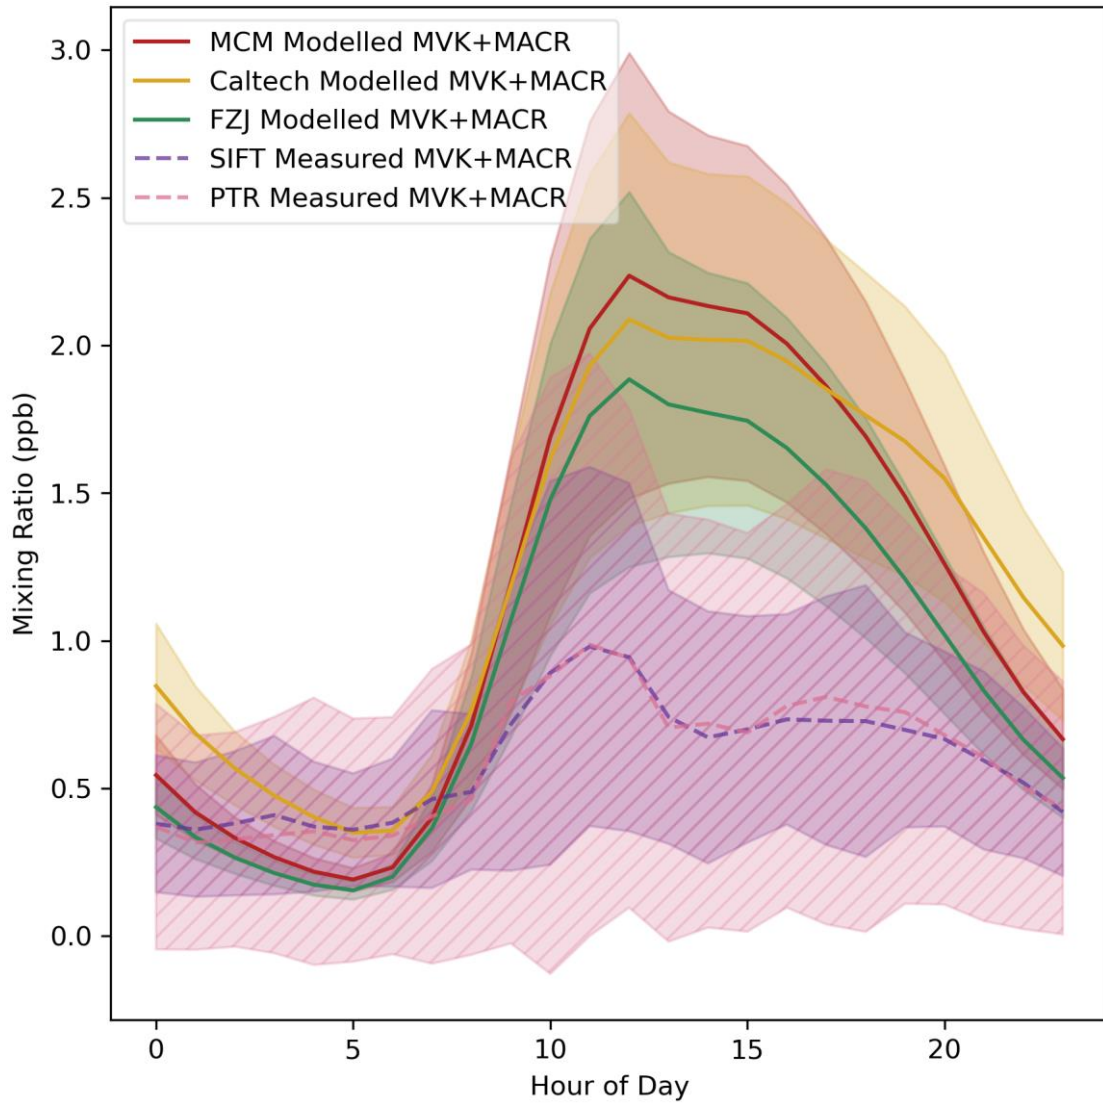

Figure S2. Measured and modelled MVK+MACR mixing ratios. Each line shows the mean value for each dataset, with the shaded area indicating one standard deviation above and below the mean.

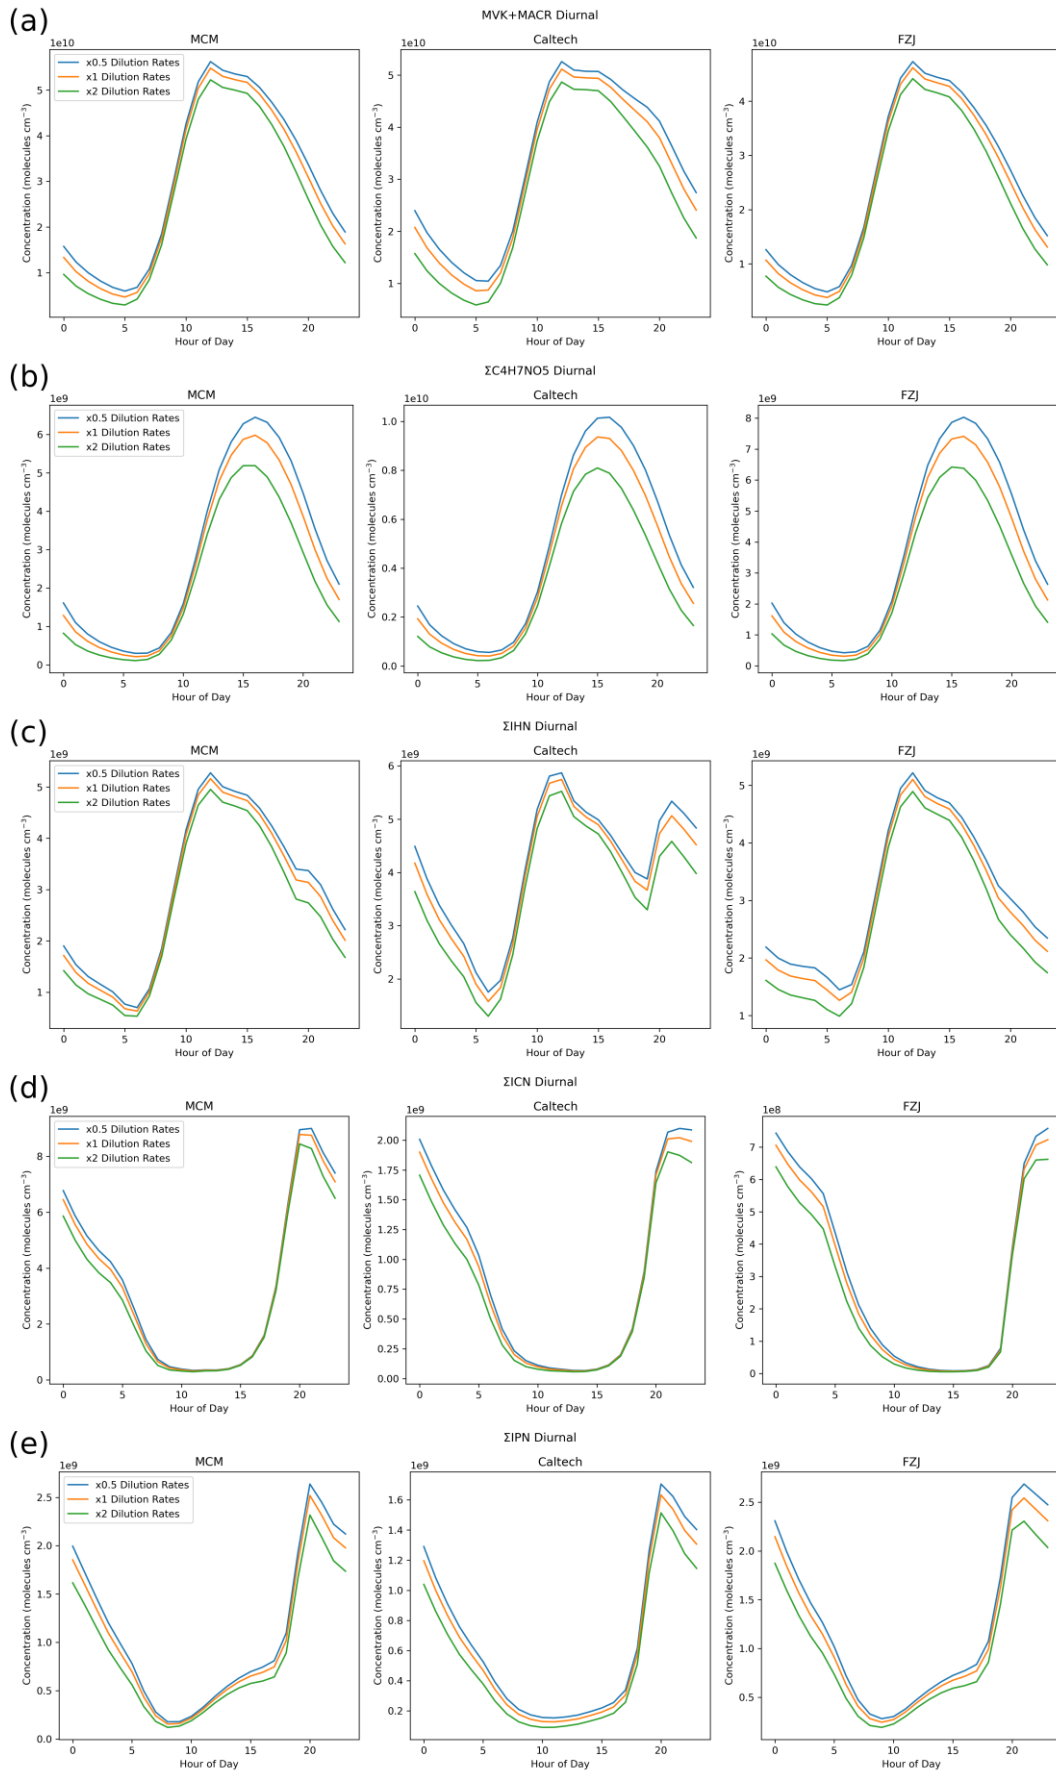

Figure S3. Impact on MVK+MACR (a),  $\Sigma C_4H_7NO_5$  (b),  $\Sigma IHN$  (c),  $\Sigma ICN$  (d), and  $\Sigma IPN$  (e) of varying the ventilation rate used in each model by 0.5 times and 2 times from the base mixing lifetime of 24 hours (a rate of  $1.157 \times 10^{-5} s^{-1}$ ).

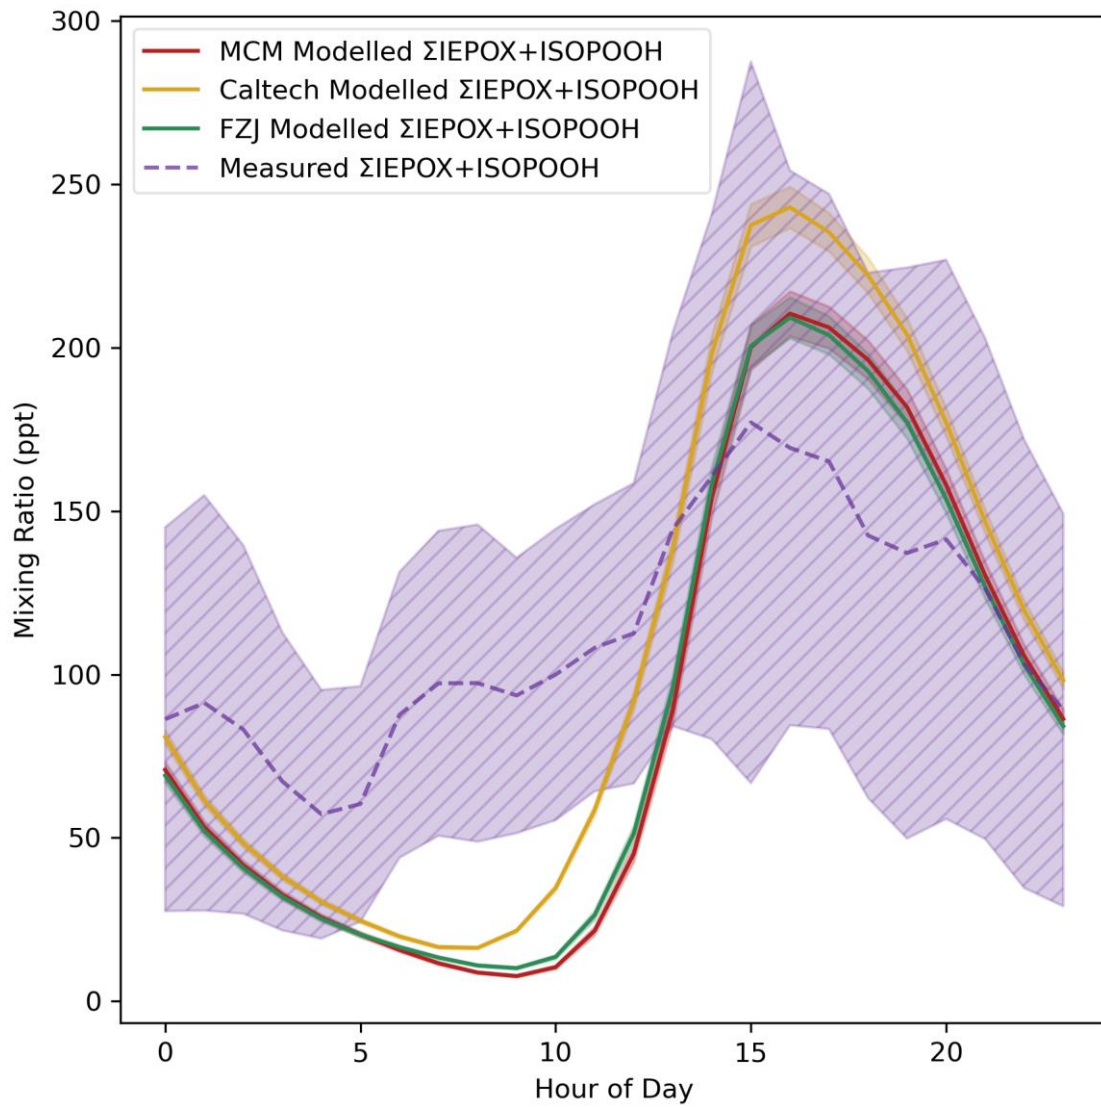

Figure S4. Measured and modelled  $\Sigma$ IEPOX+ISOPOOH mixing ratios. Each line shows the mean value for each dataset, with the shaded area indicating one standard deviation above and below the mean.

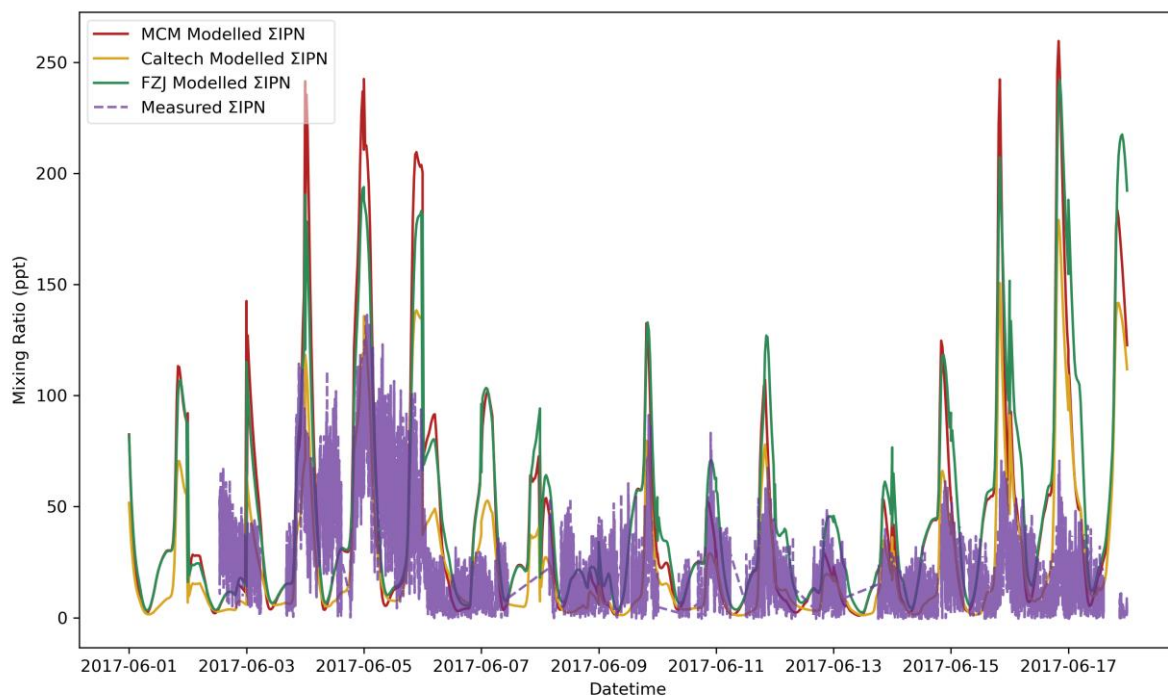

Figure S5. Time series for measured and modelled  $\Sigma$ IPN.

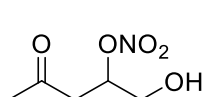

**C51NO3**

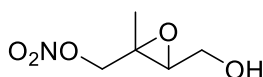

**ISOP1N23O4OH**

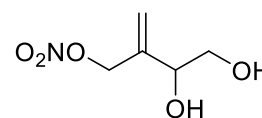

**ISOP1N253OH4OH**

Figure S6. Structures of the three isomers of IPN that collectively comprise the majority of  $\Sigma$ IPN ( $C_5H_9NO_5$ ) in the models.

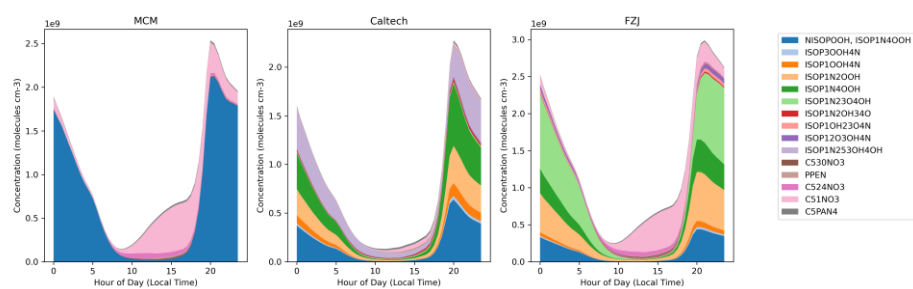

Figure S7. Isomer composition of the modelled  $\Sigma$ IPN.



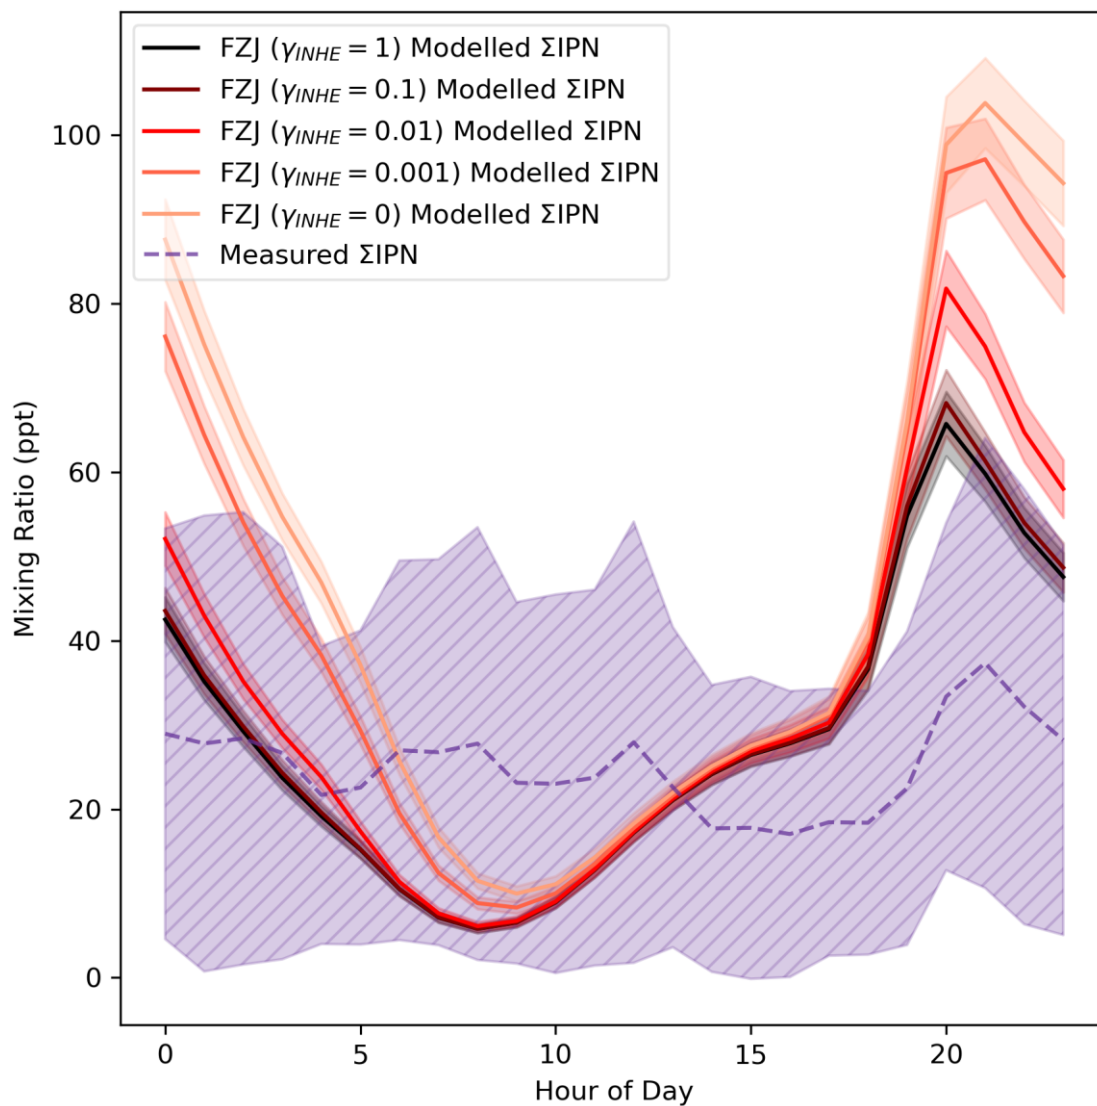

Figure S8. Measured and modelled  $\Sigma$ IPN mixing ratios for FZJ models using a range of  $\gamma_{INHE}$  values to account for the reactive uptake of INHE. Each line shows the mean value for each dataset, with the shaded area indicating one standard deviation above and below the mean.



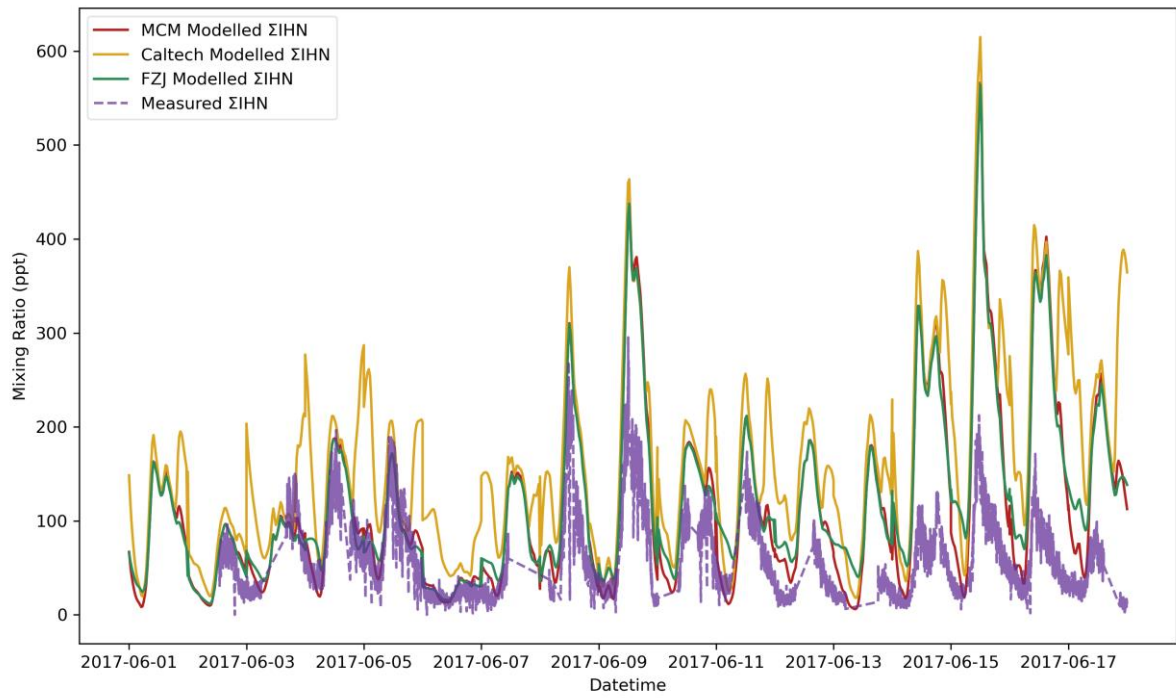

Figure S9. Time series for measured and modelled  $\Sigma$ IHN.

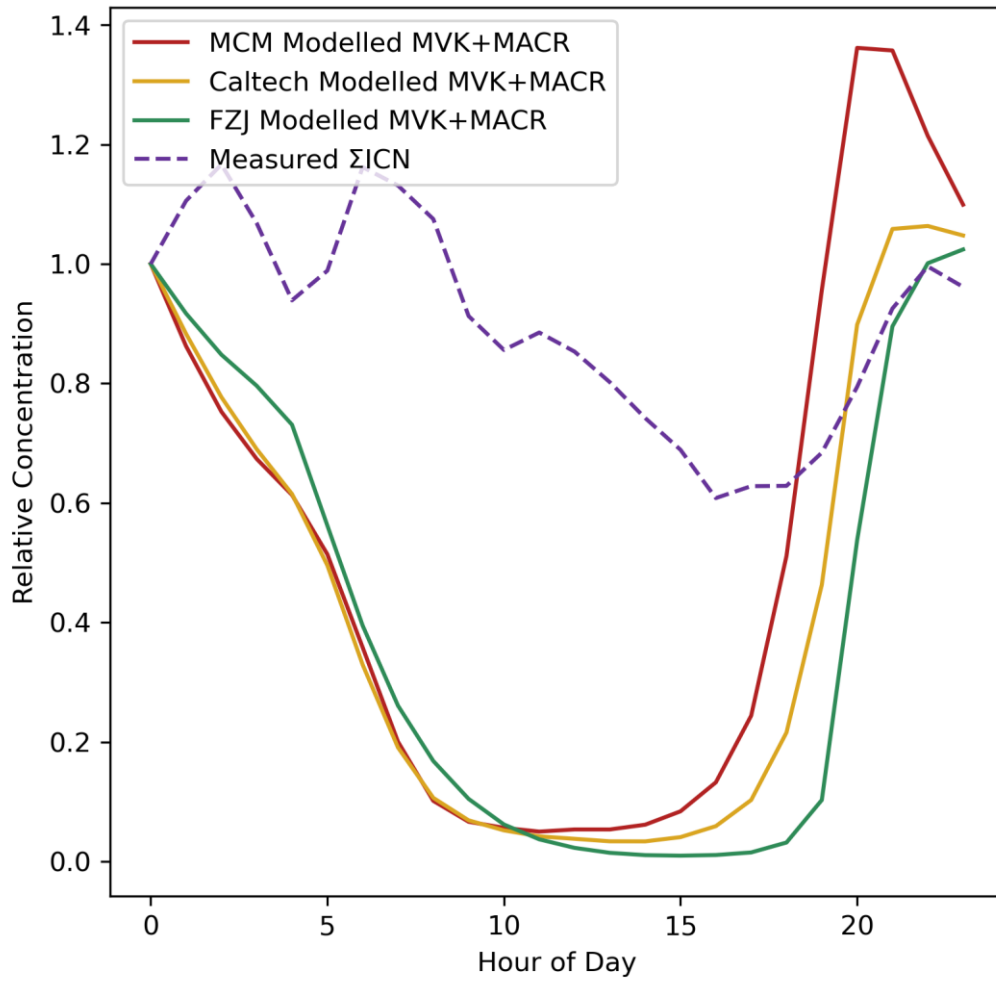

Figure S10. Measured and modelled ICN relative to the concentration at 00:00.

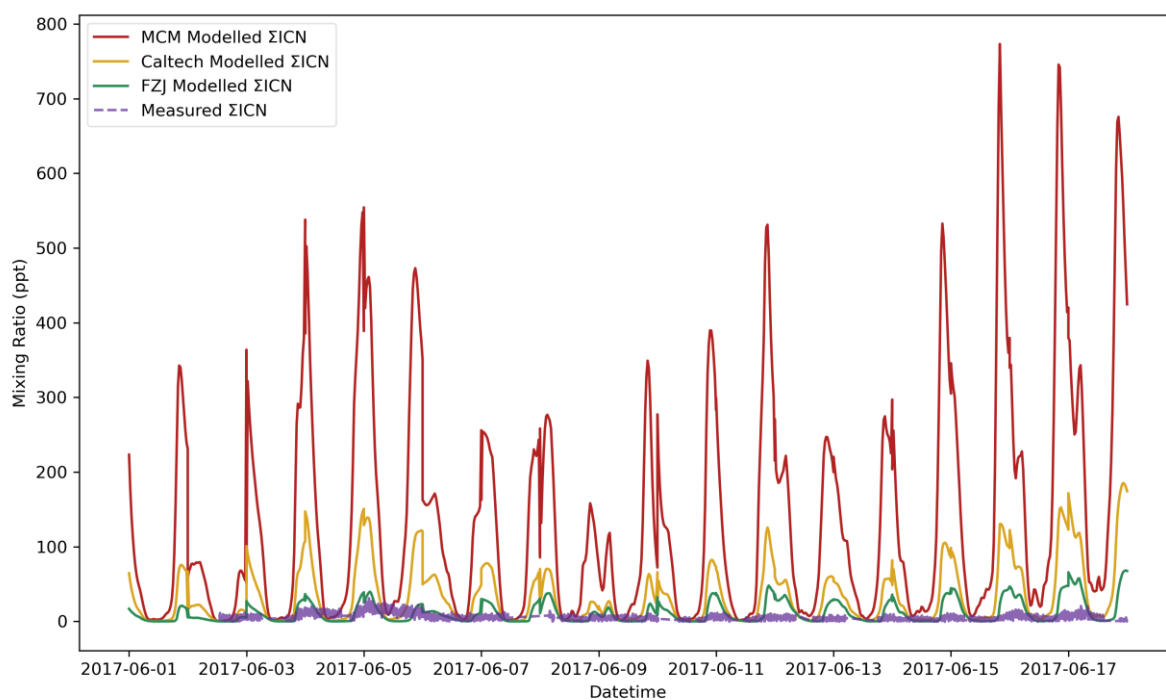

Figure S11. Time series for measured and modelled  $\Sigma$ ICN.

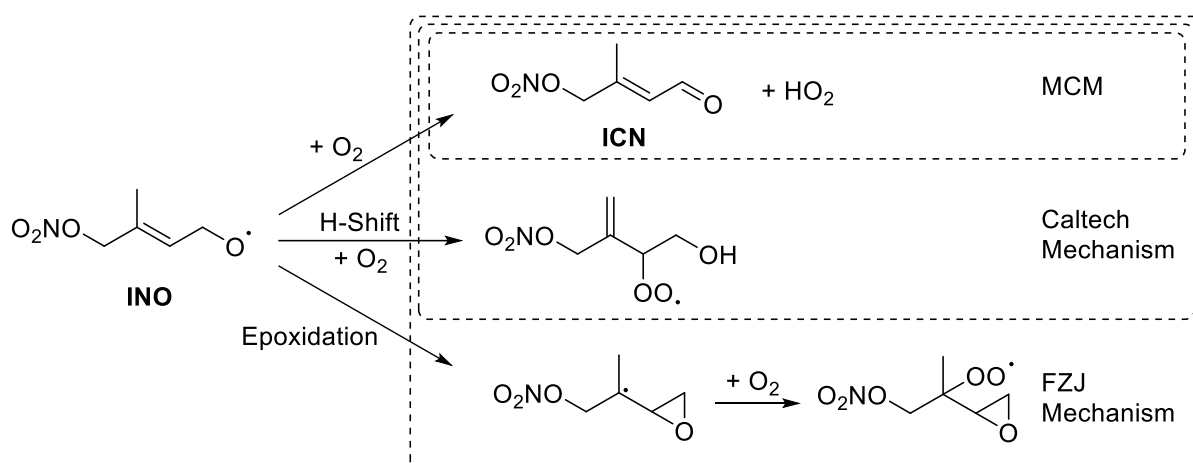

Figure S12. Examples of INO loss routes in each of the three mechanisms. Only one isomer is shown here, other isomers are present in the Caltech and FZJ Mechanisms. Additional reaction pathways are also possible in the Caltech and FZJ Mechanisms.

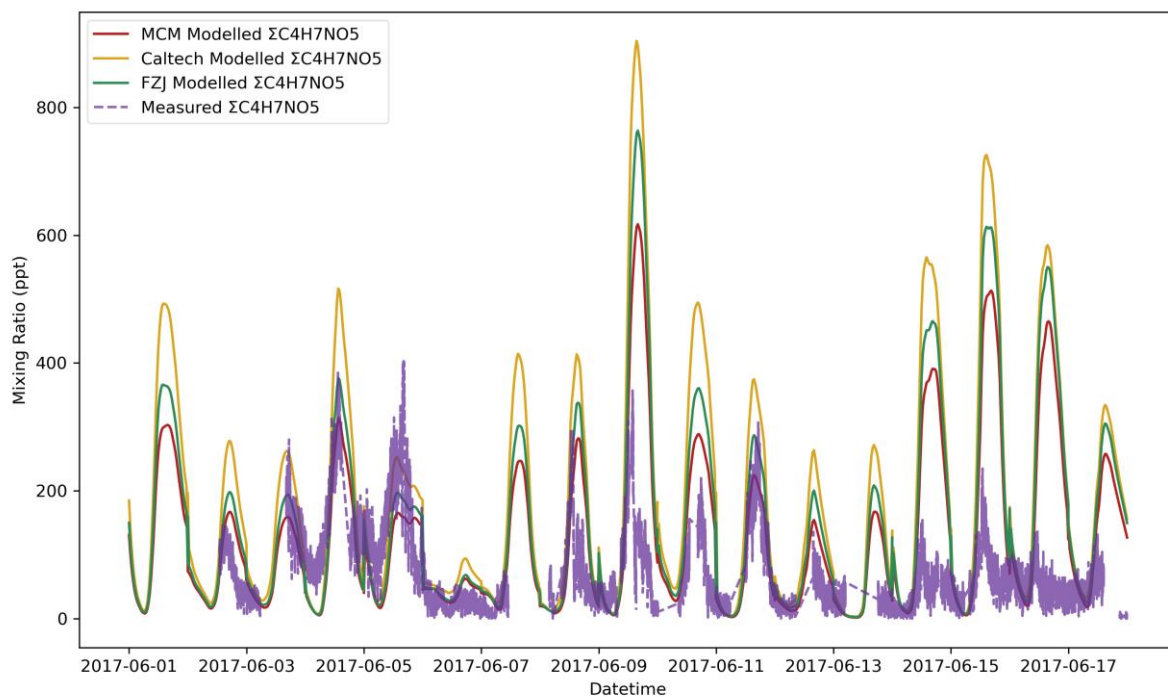

Figure S13. Time series for measured and modelled  $\Sigma C_4H_7NO_5$ .

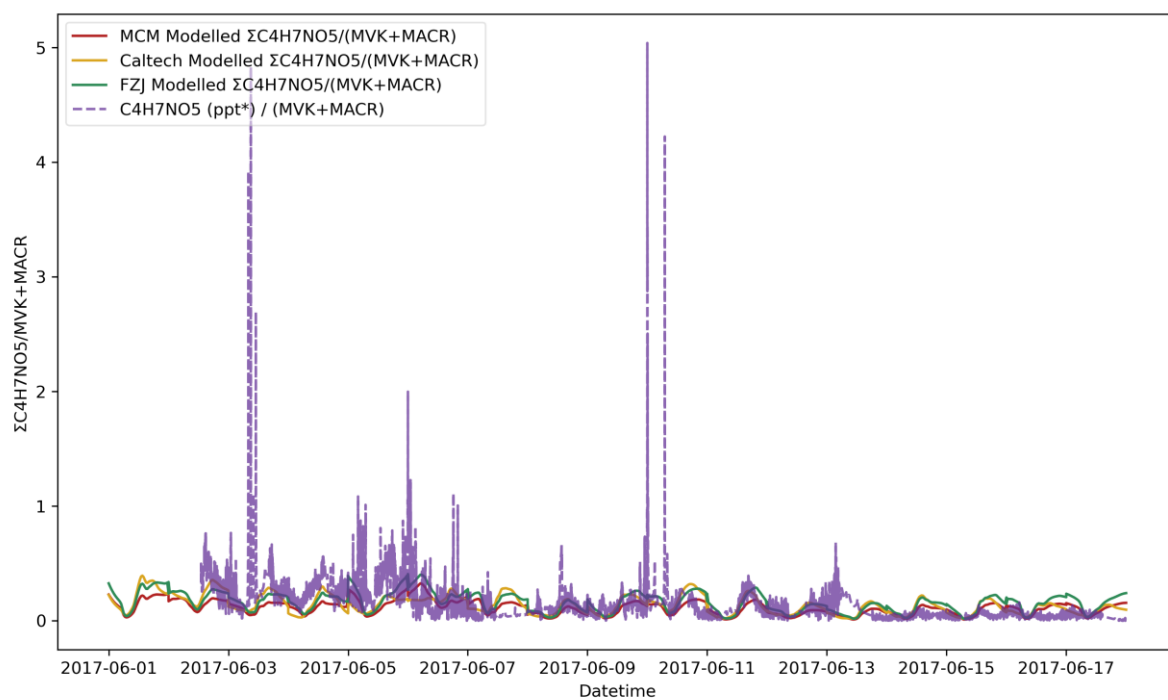

Figure S14. Time series for measured and modelled  $\Sigma C_4H_7NO_5 / (MVK+MACR)$ .

Table S4. Glossary of nitrate species and their names

| Species Group |     | Structure                                                                           | Wennberg et al. 2018 Nomenclature | MCM Name  | Caltech Mechanism Name | FZJ Mechanism Name |
|---------------|-----|-------------------------------------------------------------------------------------|-----------------------------------|-----------|------------------------|--------------------|
| ΣIHN          | IHN | 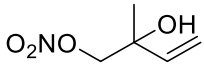   | 2,1-IHN                           | -         | ISOP1N2OH              | ISOP1N2OH          |
|               |     |    | 1,2-IHN                           | ISOPBNO3  | ISOP1OH2N              | ISOP1OH2N          |
|               |     |    | 3,4-IHN                           | ISOPDNO3  | ISOP3N4OH              | ISOP3N4OH          |
|               |     |    | 4,3-IHN                           | ISOP34NO3 | ISOP3OH4N              | ISOP3OH4N          |
|               |     |    | E-4,1-IHN                         | ISOPCNO3  | ISOP1N4Oht             | EISOP1N4OH         |
|               |     |    | E-1,4-IHN                         | ISOPANO3  | ISOP1OH4Nt             | EISOP1OH4N         |
|               |     |   | Z-4,1-IHN                         | -         | ISOP1N4OHc             | ZISOP1N4OH         |
|               |     |  | Z-1,4-IHN                         | -         | ISOP1OH4Nc             | ZISOP1OH4N         |
|               |     |  | -                                 | MPRKNO3   | MPRKNO3                | MPRKNO3            |
|               |     |  | -                                 | MIPKBNO3  | MIPKBNO3               | MIPKBNO3           |

| Species Group |     | Structure                                                                           | Wennberg et al. 2018 Nomenclature | MCM Name  | Caltech Mechanism Name | FZJ Mechanism Name |
|---------------|-----|-------------------------------------------------------------------------------------|-----------------------------------|-----------|------------------------|--------------------|
|               |     | 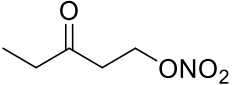   | -                                 | DIEKBN03  | DIEKBN03               | DIEKBN03           |
|               |     |    | -                                 | C4CHOBNO3 | C4CHOBNO3              | C4CHOBNO3          |
| ΣICN          |     |    | 1,4-ICN                           | NC4CHO    | ISOP1CO4N              | ISOP1CO4N          |
|               |     |    | 4,1-ICN                           | -         | ISOP1N4CO              | ISOP1N4CO          |
|               |     |    | 3,4-ICN                           | -         | ISOP3CO4N              | ISOP3CO4N          |
| ΣIPN          | IPN |    | 2,1-IPN                           | -         | ISOP1N2OOH             | ISOP1N2OOH         |
|               |     |    | 3,4-IPN                           | -         | ISOP3OOH4N             | ISOP3OOH4N         |
|               |     |   | 4,1-IPN                           | NISOPOOH  | ISOP1N4OOH             | ISOP1N4OOH         |
|               |     |  | 1,4-IPN                           | -         | ISOP1OOH4N             | ISOP1OOH4N         |
|               |     |  | -                                 | C530NO3   | -                      | C530NO3            |
|               |     |  | -                                 | PPEN      | PPEN                   | PPEN               |

| Species Group       |              | Structure                                                                           | Wennberg et al. 2018 Nomenclature | MCM Name | Caltech Mechanism Name | FZJ Mechanism Name |
|---------------------|--------------|-------------------------------------------------------------------------------------|-----------------------------------|----------|------------------------|--------------------|
|                     |              | 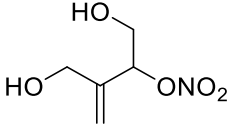   | -                                 | C524NO3  | -                      | C524NO3            |
|                     |              |    | -                                 | C51NO3   | C51NO3                 | C51NO3             |
|                     |              |    | -                                 | C5PAN4   | C5PAN4                 | C5PAN4             |
|                     |              |    | -                                 | -        | ISOP1N253OH4OH         | -                  |
|                     |              |    | -                                 | -        | ISOP1N23O4OH           | ISOP1N23O4OH       |
|                     |              |    | -                                 | -        | ISOP1N2OH34O           | ISOP1N2OH34O       |
|                     |              |   | -                                 | -        | ISOP1OH23O4N           | ISOP1OH23O4N       |
|                     |              |  | -                                 | -        | ISOP12O3OH4N           | ISOP12O3OH4N       |
| $\Sigma C_4H_7NO_5$ | $C_4H_7NO_5$ |  | -                                 | HMVKAN03 | MVK3OH4N               | HMVKAN03           |



| Species Group | Structure                                                                           | Wennberg et al. 2018 Nomenclature | MCM Name   | Caltech Mechanism Name | FZJ Mechanism Name |
|---------------|-------------------------------------------------------------------------------------|-----------------------------------|------------|------------------------|--------------------|
|               | 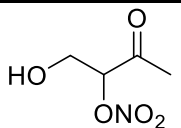   | -                                 | MVKNO3     | MVK3N4OH               | MVKNO3             |
|               |    | -                                 | MACRNO3    | MACR2N3OH              | MACRNO3            |
|               |    | -                                 | MACRNB     | MACR2OH3N              | MACRNB             |
|               |    | -                                 | MPRNO3CO2H | MPRNO3CO2H             | MPRNO3CO2H         |
|               |    | -                                 | NBUTDBOOH  | NBUTDBOOH              | NBUTDBOOH          |
|               |    | -                                 | CO3C4NO3OH | CO3C4NO3OH             | CO3C4NO3OH         |
|               |    | -                                 | PBN        | PBN                    | PBN                |
|               |   | -                                 | PIPN       | PIPN                   | PIPN               |
|               |  | -                                 | NBUTDAOH   | NBUTDAOH               | NBUTDAOH           |
